# Supplementary material for: MicroRNA-338-5p alleviates neuronal apoptosis via directly targeting BCL2L11 in APP/PS1 mice
Source: publisher site journal article supplement (doi:10.18632/aging.104005), 2020-10-13
Supplement: Supplementary file [file aging-v12i20-104005-supplementary-material-SD1.pdf]

SUPPLEMENTARY FIGURE

A

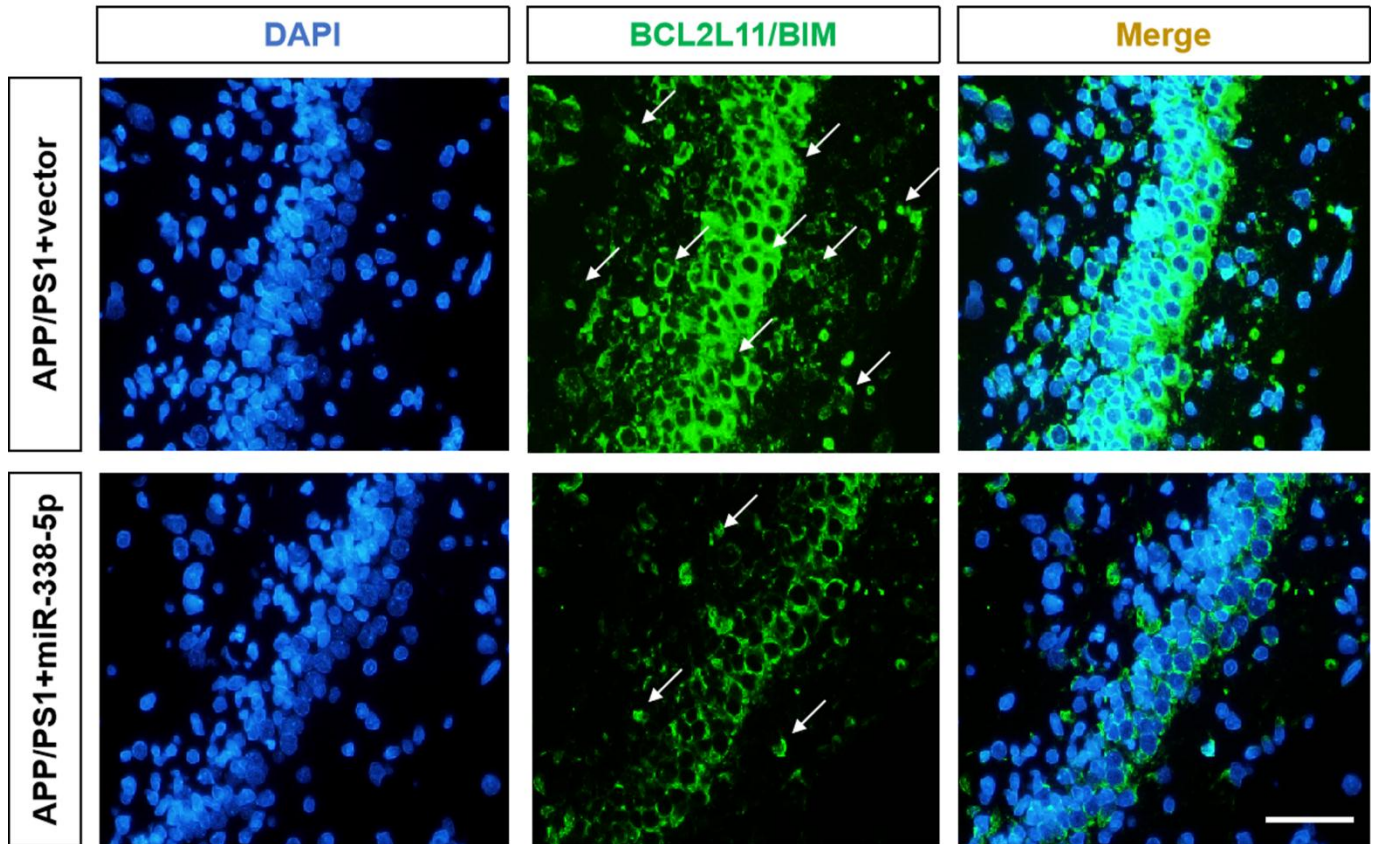

Supplementary Figure 1. The representative immunofluorescence images of BCL2L11/BIM staining in APP/PS1 mice. (A) Scale bar = 50 $\mu$ m.
